# Supplementary material
Source: PubMed Central journal article supplement (PMC5826577)

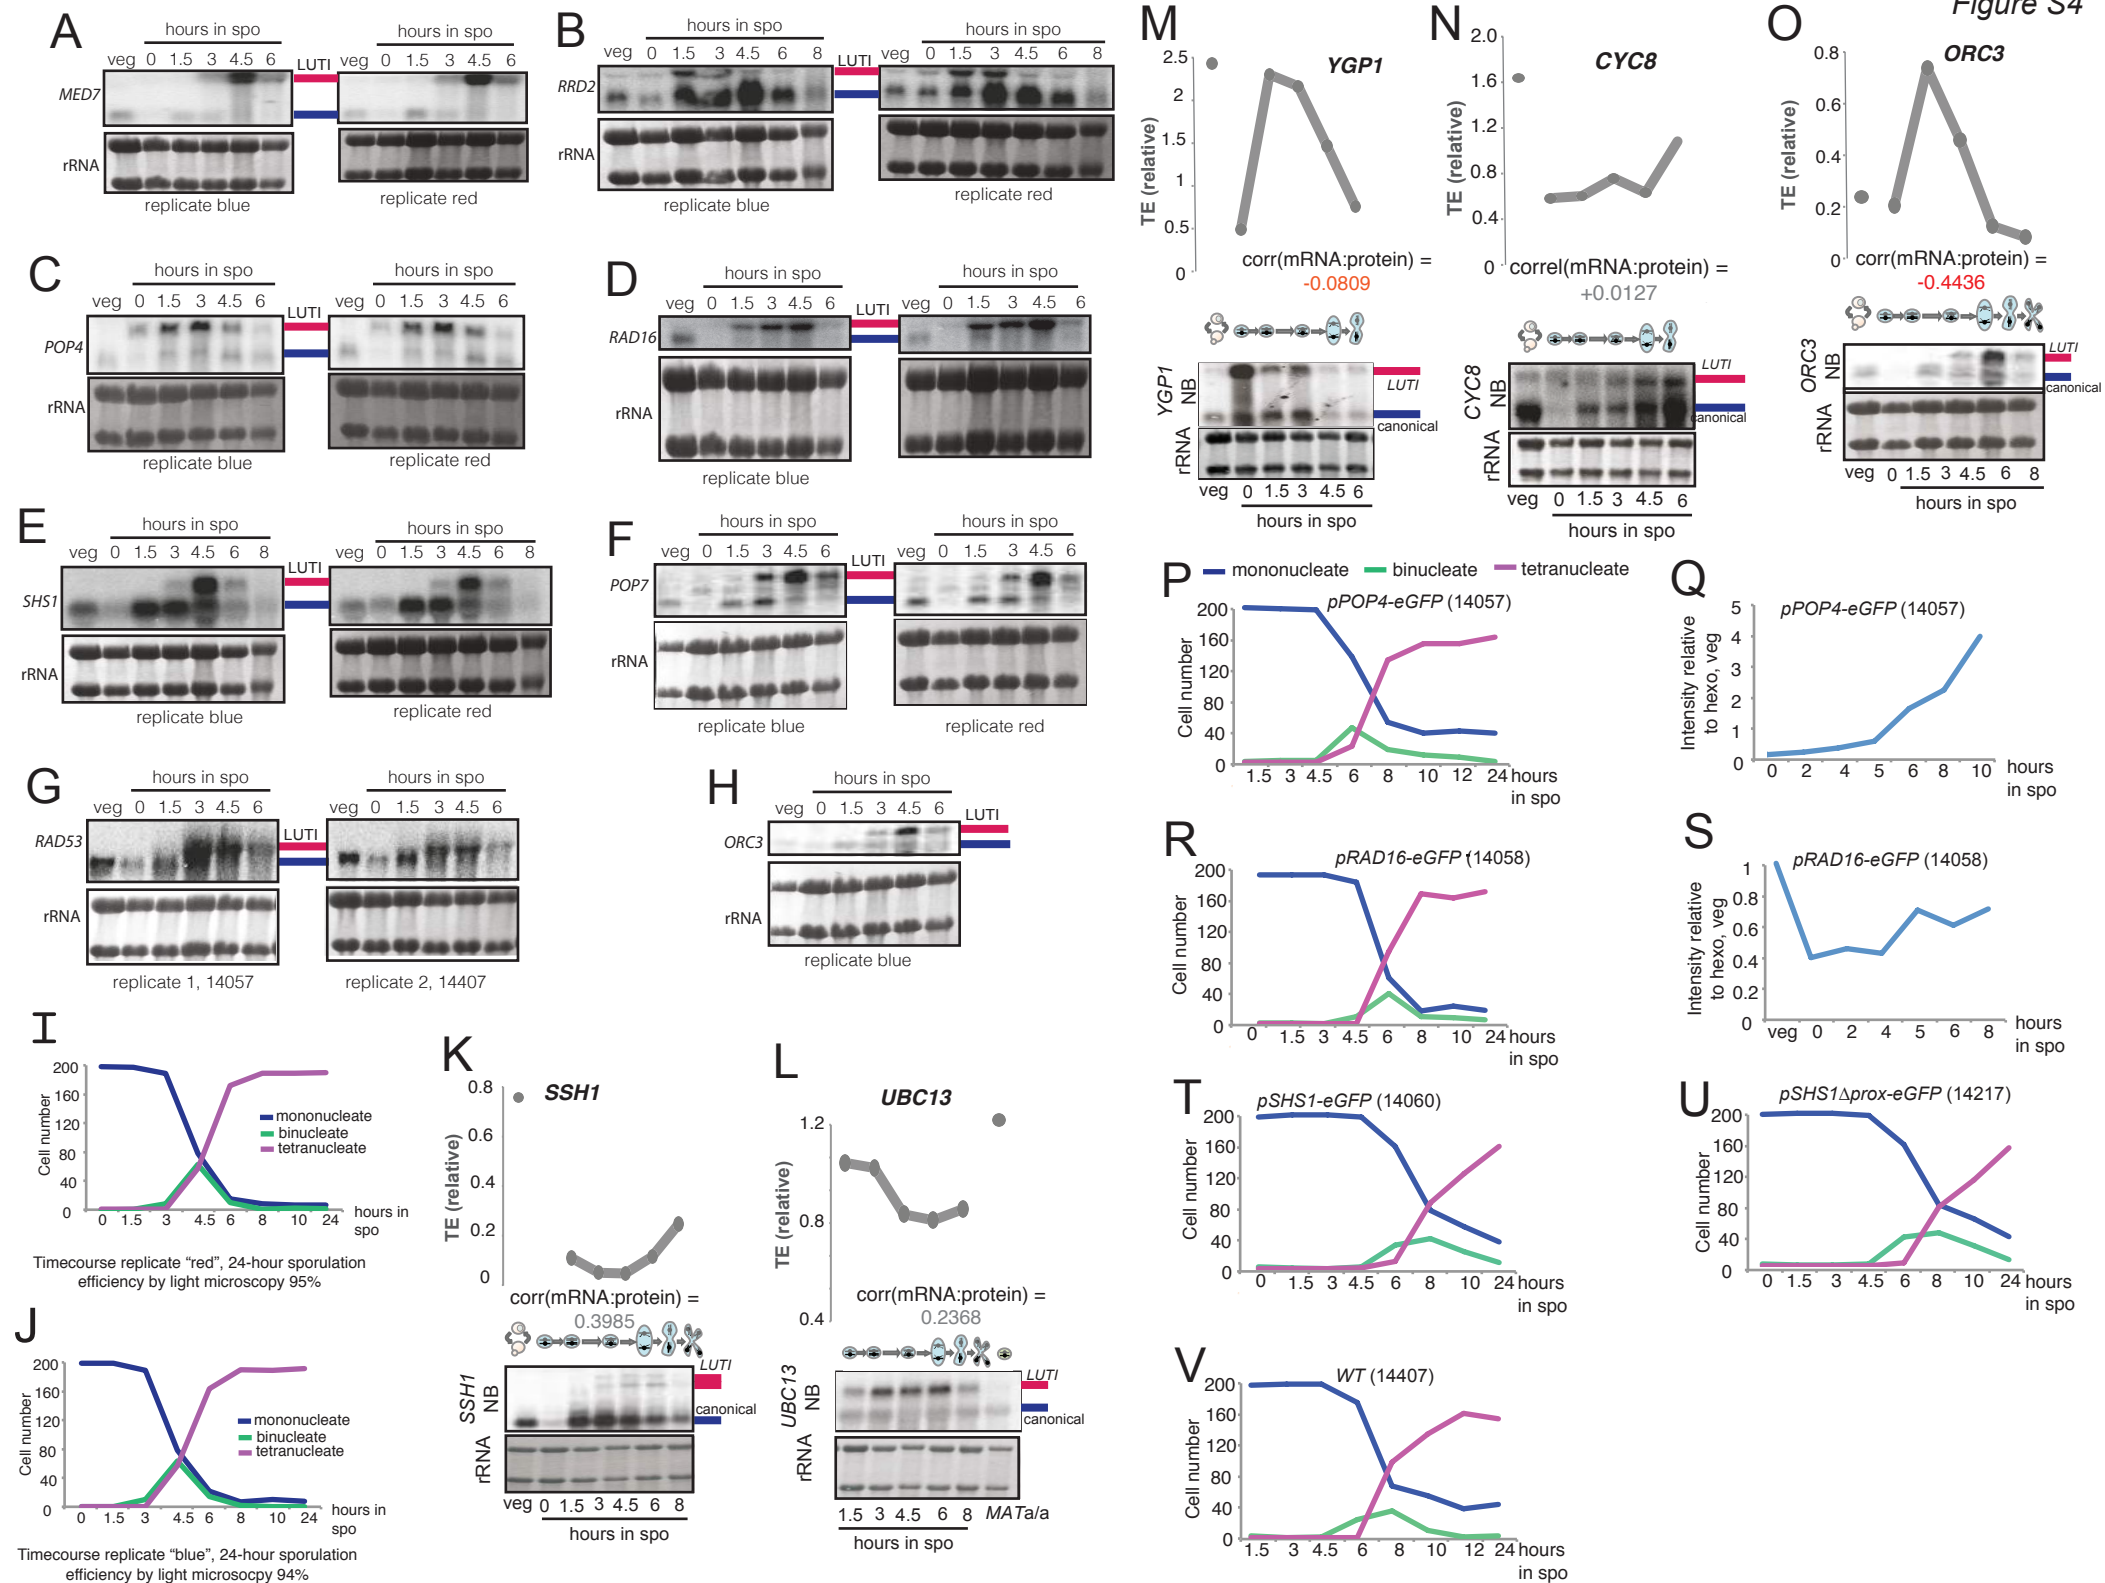

Supplement: NIHMS938466-supplement-14.pdf [file NIHMS938466-supplement-14.pdf]

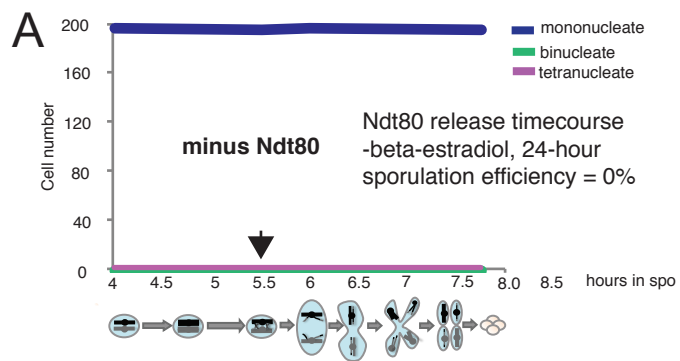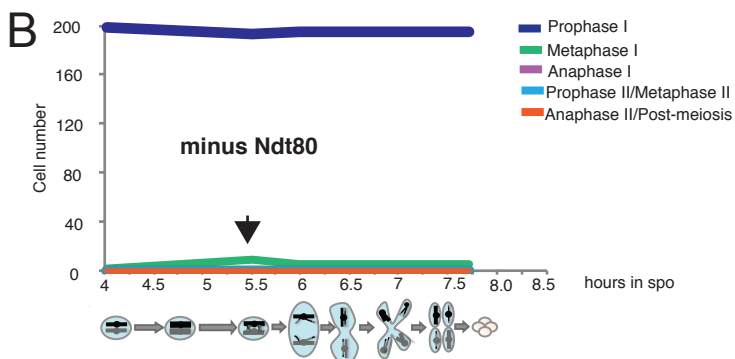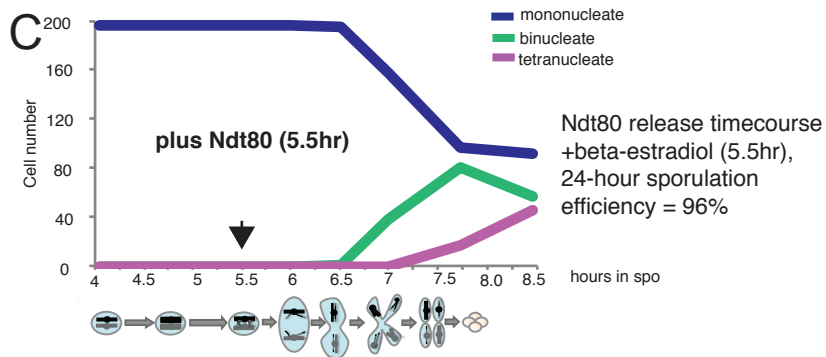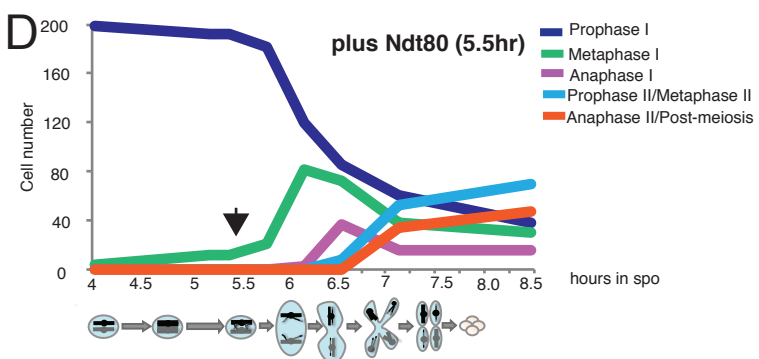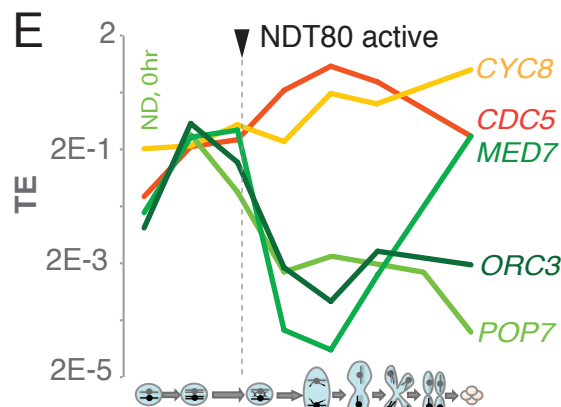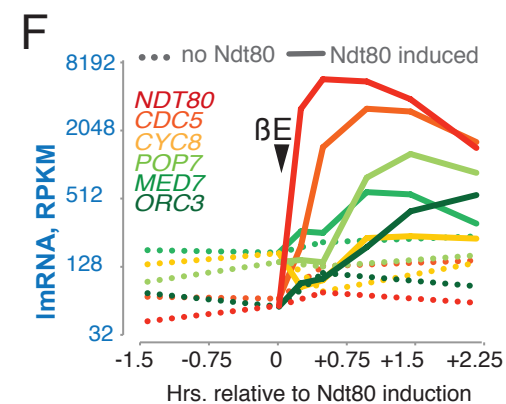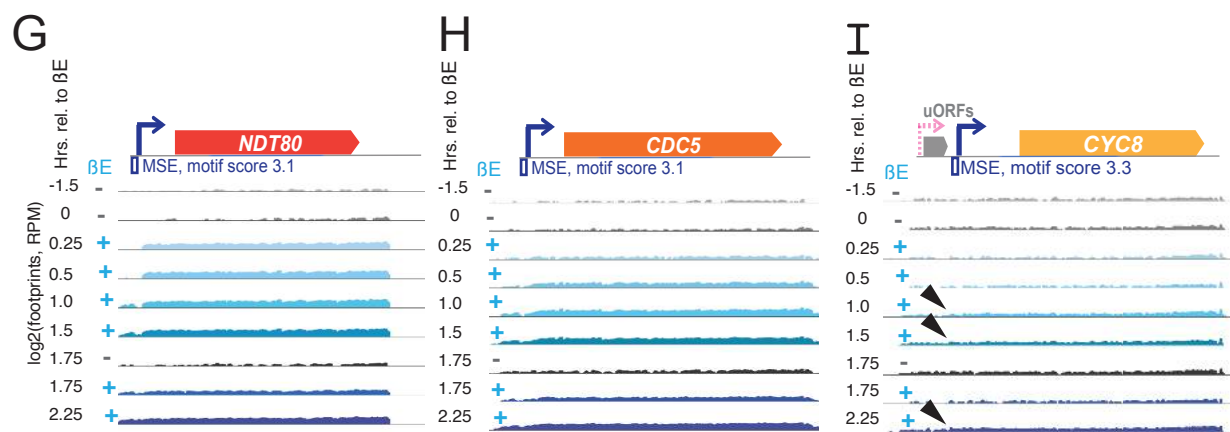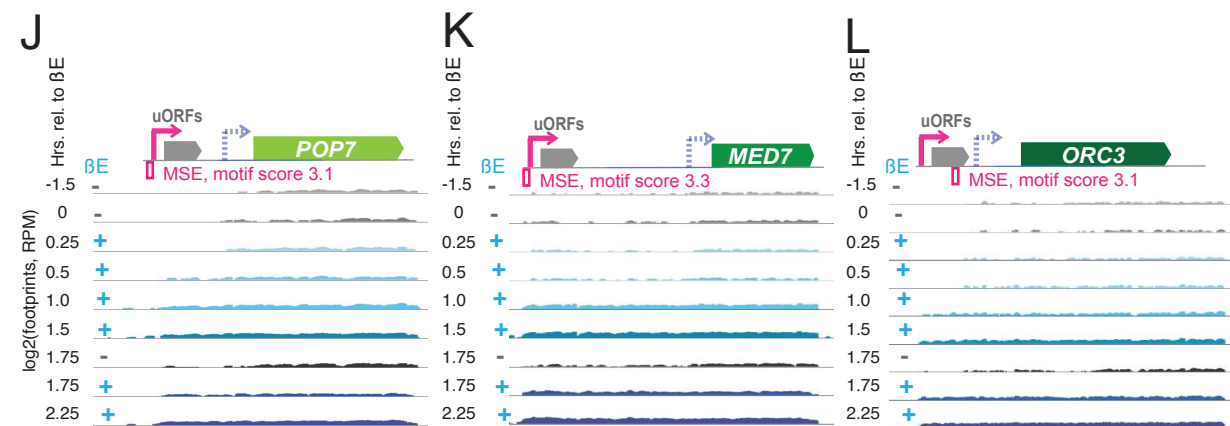

Supplement: NIHMS938466-supplement-15.pdf [file NIHMS938466-supplement-15.pdf]

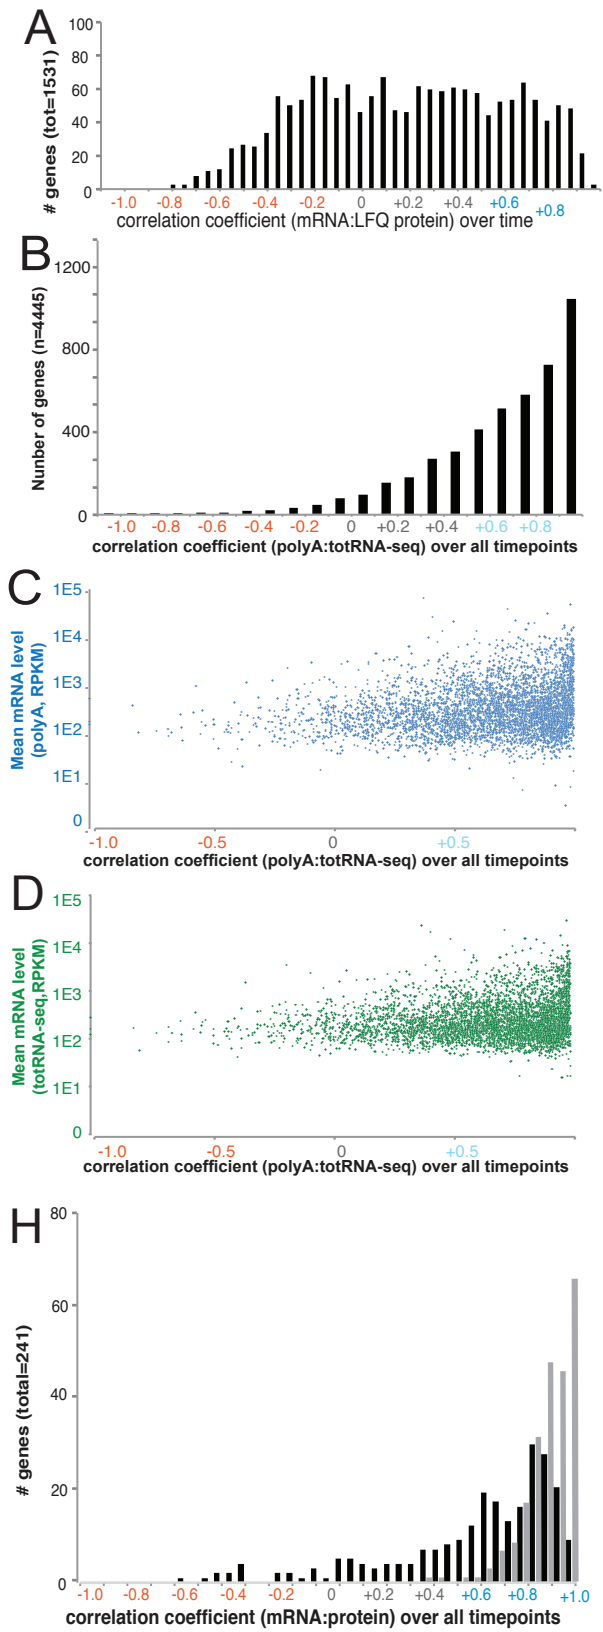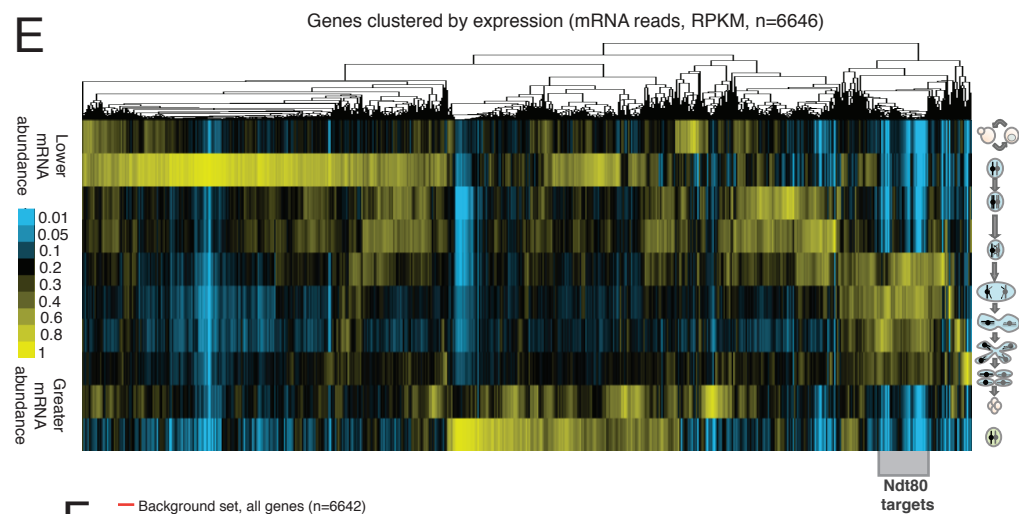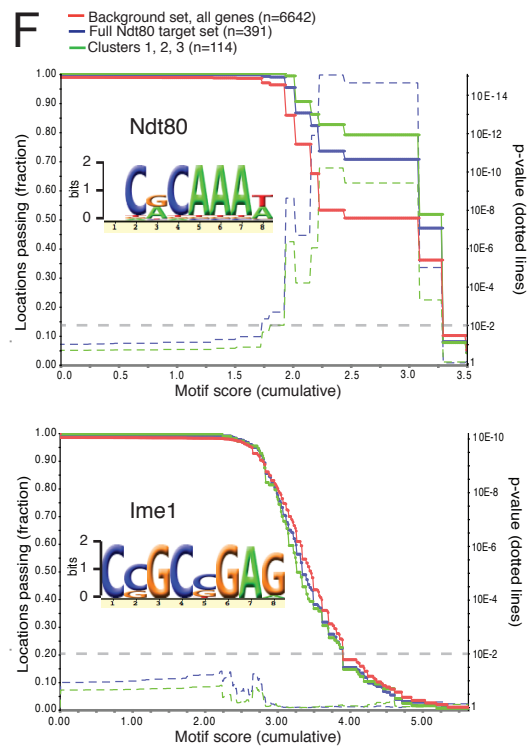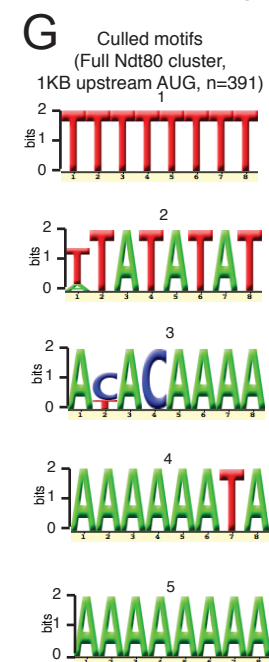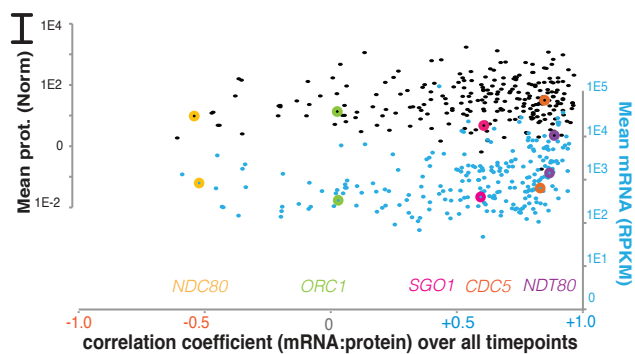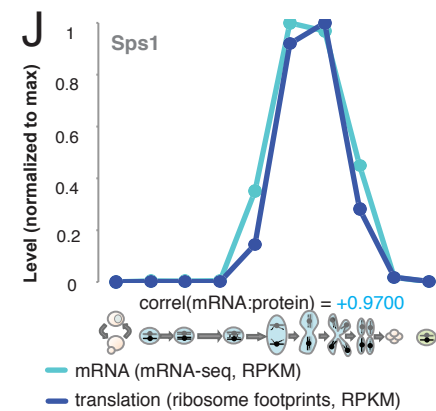

Supplement: NIHMS938466-supplement-2.pdf [file NIHMS938466-supplement-2.pdf]

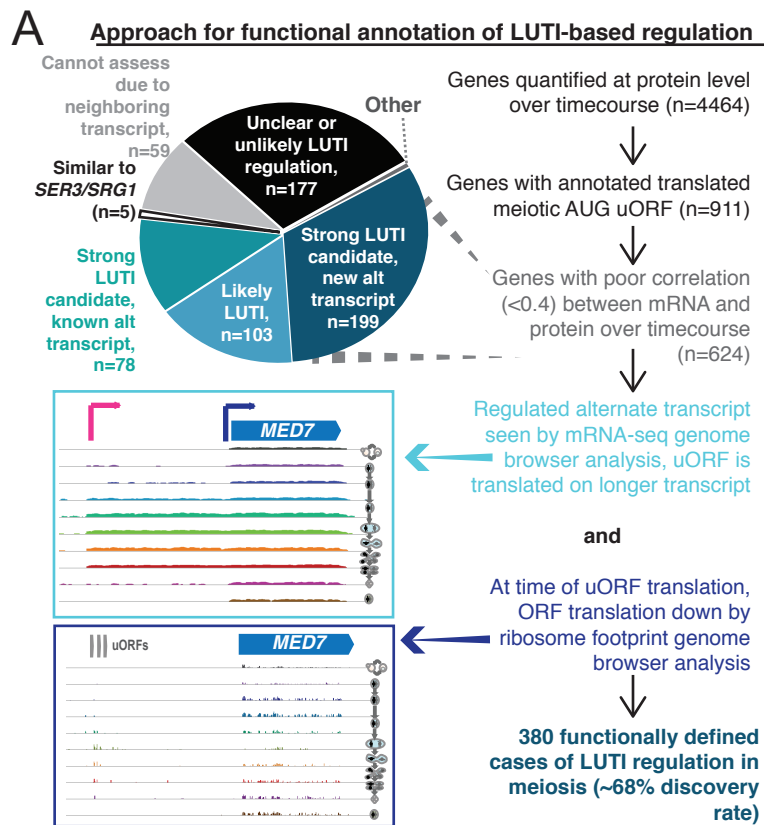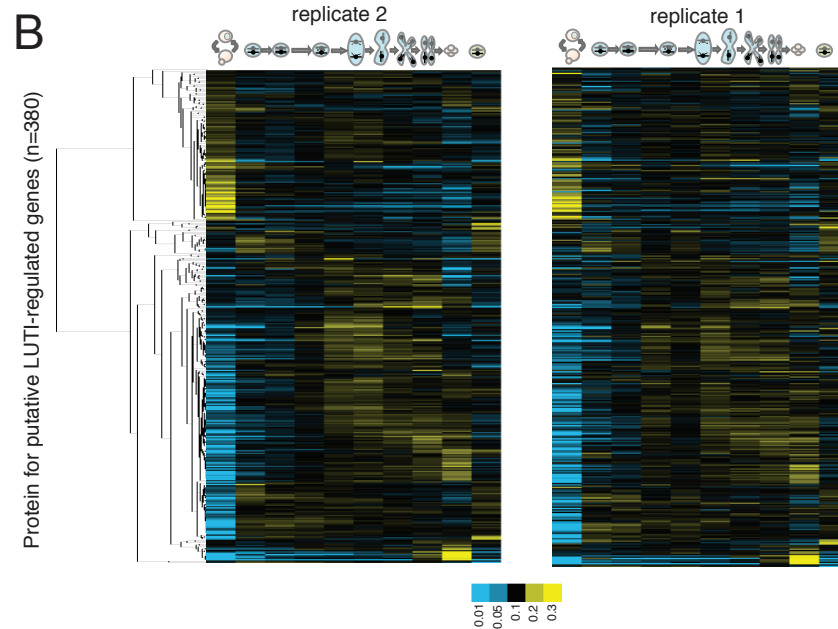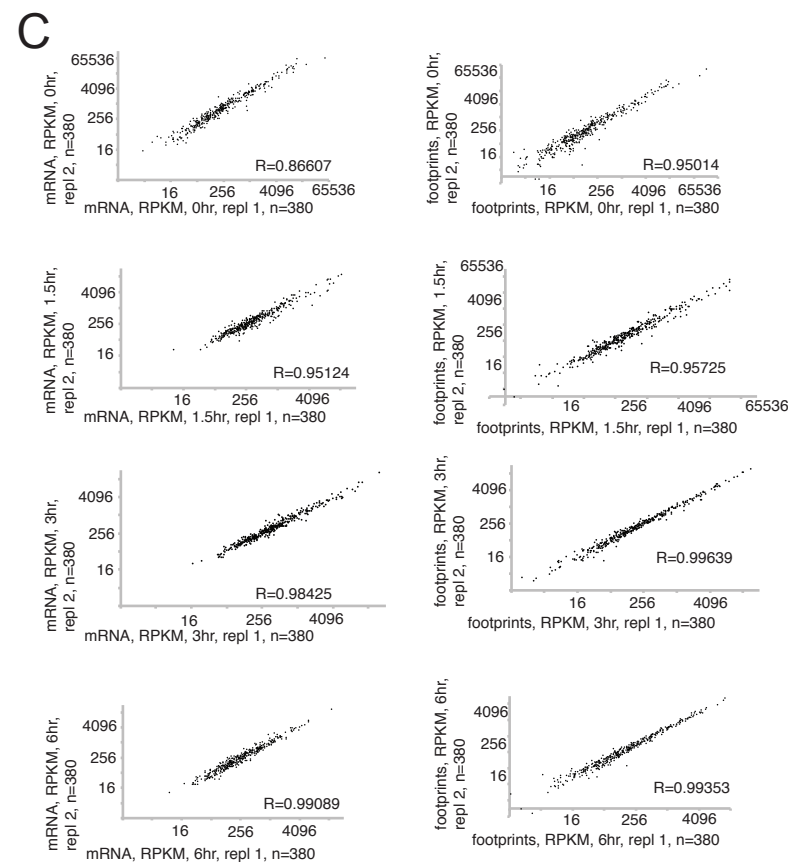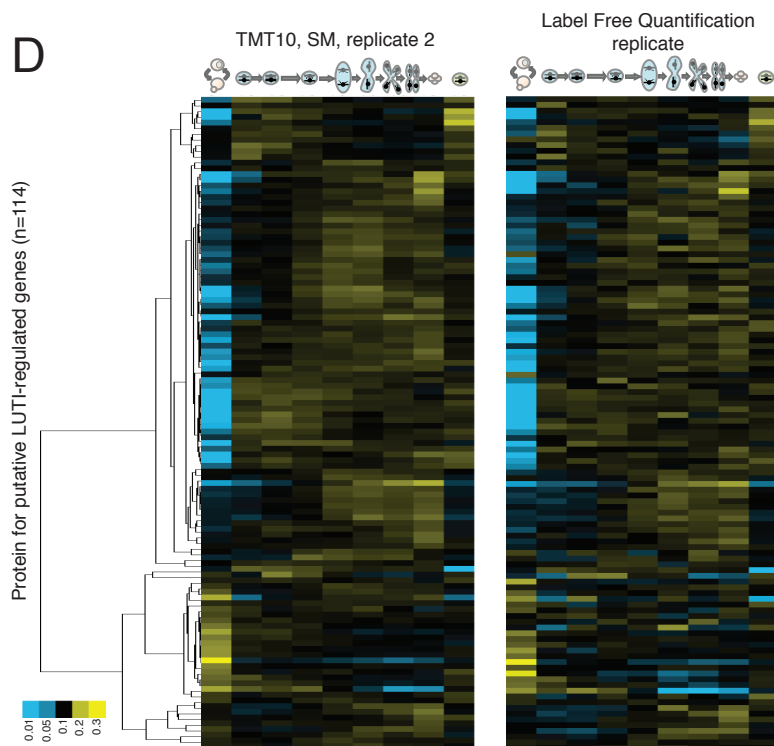

Supplement: NIHMS938466-supplement-3.pdf [file NIHMS938466-supplement-3.pdf]
